# Supplementary material for: PKCδ regulates integrin αVβ3 expression and transformed growth of K-ras dependent lung cancer cells
Source: PubMed Central journal article supplement (PMC4951259; doi:10.18632/oncotarget.7560), 2016-02-21
Supplement: oncotarget-07-17905-s001.pdf [file oncotarget-07-17905-s001.pdf]

## PKC $\delta$ regulates integrin $\alpha_v\beta_3$ expression and transformed growth of K-ras dependent lung cancer cells

### Supplementary Material

**Table S1: Shared genes regulated by PKC $\delta$  in K-ras dependent or independent NSCLC cells.** Data is the average change in expression of significant genes in both K-ras dependent (H2009 and H441) or K-ras independent (A549 and H460) cell lines ( $p < 0.05$ ). Only genes that were increased or decreased in both cell lines are included for each K-ras subpopulation.

| K-ras Dependent    |       |                  |      | K-ras Independent  |       |                  |      |
|--------------------|-------|------------------|------|--------------------|-------|------------------|------|
| Down (fold change) |       | Up (fold change) |      | Down (fold change) |       | Up (fold change) |      |
| PRKCD              | -4.11 | CD274            | 2.61 | PRKCD              | -3.05 | OR51B4           | 2.34 |
| PI3                | -3.58 | CALB2            | 2.54 | GPRC5B             | -2.24 | HBE1             | 2.24 |
| SPINK6             | -3.45 | TRPA1            | 2.49 | ADA                | -2.09 | STC1             | 2.03 |
| ALDH1A1            | -2.72 | GFPT2            | 2.01 | RAB23              | -1.97 | BDKRB1           | 2.01 |
| RAB23              | -2.42 | LCP1             | 1.97 | HOXA2              | -1.83 | CYP1B1           | 1.99 |
| C9orf5             | -2.38 | SLC1A3           | 1.86 | CP                 | -1.82 | SLC16A6          | 1.99 |
| PON2               | -2.03 | DYNLRB1          | 1.84 | FERMT2             | -1.77 | TFF1             | 1.92 |
| CFL1               | -2.02 | HSD17B10         | 1.84 | TMEM47             | -1.72 | EDIL3            | 1.86 |
| GALC               | -2.01 | MUC13            | 1.83 | C9orf5             | -1.70 | HHIPL2           | 1.80 |
| ADA                | -1.95 | TIMP3            | 1.79 | HOXA3              | -1.67 | SMOC1            | 1.76 |
| CALU               | -1.93 | HOXB9            | 1.77 | TERF2IP            | -1.63 | TRPA1            | 1.74 |
| RBM9               | -1.91 | NROB1            | 1.74 | RNF157             | -1.62 | HSD17B10         | 1.69 |
| SAMD9              | -1.87 | RELN             | 1.70 | FAM171A1           | -1.61 | DYNLRB1          | 1.67 |
| STK38              | -1.85 | CLU              | 1.65 | SCARA3             | -1.59 | SLC4A4           | 1.65 |
| FSTL1 MIR198       | -1.82 | TMED4            | 1.64 | SNX27              | -1.58 | GLRX             | 1.65 |
| CROT               | -1.78 | BMP6             | 1.64 | LIFR               | -1.56 | SYTL3            | 1.61 |
| TERF2IP            | -1.77 | WARS             | 1.62 | NRP2               | -1.56 | SCARNA7          | 1.60 |

|            |       |           |      |          |       |                     |      |
|------------|-------|-----------|------|----------|-------|---------------------|------|
| VAMP7      | -1.74 | GBP1 GBP3 | 1.61 | DGKA     | -1.52 | MDM2                | 1.57 |
| ASCC3      | -1.74 | PMP22     | 1.61 | RBM9     | -1.51 | ELL2                | 1.56 |
| LIFR       | -1.73 | FERMT3    | 1.59 | CTSH     | -1.49 | IGFBP3              | 1.55 |
| ITGA3      | -1.72 | NID2      | 1.58 | CDK6     | -1.47 | MT1X                | 1.54 |
| C1orf85    | -1.71 | B3GALNT2  | 1.56 | NDRG2    | -1.46 | MCTP1               | 1.50 |
| SNX27      | -1.71 | TNC       | 1.54 | RNF185   | -1.46 | DKFZp686O24166      | 1.50 |
| TSPAN1     | -1.71 | HBA1 HBA2 | 1.52 | HMOX1    | -1.46 | KATNAL1             | 1.45 |
| HIRA       | -1.65 | GLP2R     | 1.52 | EDA2R    | -1.45 | NF2                 | 1.45 |
| NRAS CSDE1 | -1.65 | HBA2 HBA1 | 1.51 | PSME3    | -1.44 | TMED4               | 1.44 |
| GPRC5A     | -1.64 | GPT2      | 1.51 | FBLN1    | -1.43 | SPRY4               | 1.44 |
| NEK7       | -1.64 | CENPV     | 1.50 | TULP3    | -1.42 | CCDC68              | 1.41 |
| ELF4       | -1.64 | ANKRD36B  | 1.49 | C5orf25  | -1.42 | B3GALNT2            | 1.41 |
| ELF3       | -1.64 | RPIA      | 1.49 | STRA6    | -1.42 | SCARNA9L            | 1.41 |
| AMIGO2     | -1.60 | MYC       | 1.48 | MRC2     | -1.42 | ATP2B1              | 1.39 |
| IL6ST      | -1.59 | C9orf37   | 1.48 | PON2     | -1.40 | SLC25A32 DCAF1<br>3 | 1.37 |
| PSME3      | -1.59 | MTHFD2    | 1.48 | UGP2     | -1.40 | KRT17               | 1.35 |
| SMAD5      | -1.58 | KIAA1804  | 1.46 | TLR3     | -1.39 | SLC9A2              | 1.35 |
| RAB5B      | -1.57 | KCNG1     | 1.46 | JAK1     | -1.39 | CLGN                | 1.34 |
| DHRS3      | -1.56 | LYRM1     | 1.46 | PDK3     | -1.39 | FOS                 | 1.33 |
| TNFRSF10D  | -1.56 | COX10     | 1.45 | PLK2     | -1.39 | SS18                | 1.33 |
| TM9SF1     | -1.55 | ADD2      | 1.44 | ARRB1    | -1.38 | IL20RB              | 1.33 |
| RBP4       | -1.55 | PRKD1     | 1.44 | ANKRD54  | -1.38 | GBA2 CREB3          | 1.32 |
| GOLIM4     | -1.54 | NPM3      | 1.44 | PQLC3    | -1.38 | MAP2K3              | 1.31 |
| BNIP3L     | -1.53 | FAM27E3   | 1.44 | SMAD5    | -1.38 | ZC3HAV1L            | 1.31 |
| WDR45L     | -1.53 | MAFG      | 1.44 | BNIP3L   | -1.37 | IRS2                | 1.31 |
| YIPF6      | -1.53 | FAM27E3   | 1.43 | ATP6V1C1 | -1.37 | CABYR               | 1.28 |

|                         |       |           |      |                |       |        |      |
|-------------------------|-------|-----------|------|----------------|-------|--------|------|
| FERMT2                  | -1.53 | CUTC      | 1.42 | TMEM139        | -1.37 | FAM83A | 1.28 |
| LCOR                    | -1.52 | TYW3 CRYZ | 1.42 | CLMN           | -1.37 | FURIN  | 1.27 |
| PODXL                   | -1.51 | CABYR     | 1.42 | PLAC8          | -1.37 | PYGB   | 1.27 |
| SEPX1                   | -1.51 | PDP2      | 1.42 | ZNF281         | -1.36 | PLIN3  | 1.27 |
| F11R TSTD1              | -1.50 | NEIL3     | 1.40 | PBK            | -1.36 |        |      |
| ASAH1                   | -1.50 | DOT1L     | 1.40 | ZDHHC13        | -1.35 |        |      |
| AGRN                    | -1.50 | SLC43A1   | 1.40 | PLA2R1         | -1.35 |        |      |
| FYTDD1                  | -1.50 | CREB5     | 1.39 | TSPAN6         | -1.35 |        |      |
| NRIP1                   | -1.49 | SPRYD3    | 1.39 | TSPAN33        | -1.35 |        |      |
| SFT2D2                  | -1.49 | CPVL      | 1.39 | RNF170         | -1.34 |        |      |
| ICAM2                   | -1.49 | PALLD     | 1.39 | C1S            | -1.34 |        |      |
| LOC554202               | -1.47 | UPP1      | 1.39 | PTBP2          | -1.34 |        |      |
| EPGN                    | -1.47 | RAP1GAP2  | 1.38 | C6orf72        | -1.33 |        |      |
| DGKA                    | -1.47 | CBLB      | 1.38 | IRF2           | -1.33 |        |      |
| ITGAV                   | -1.47 | SH3PXD2B  | 1.38 | TM2D2          | -1.33 |        |      |
| DAG1                    | -1.46 | PCID2     | 1.37 | C3             | -1.32 |        |      |
| ID2                     | -1.45 | SDCCAG3   | 1.37 | AADAC          | -1.32 |        |      |
| CCNYL1                  | -1.45 | C17orf75  | 1.37 | ERBB2          | -1.32 |        |      |
| SLC39A11                | -1.45 | MTIF2     | 1.36 | GALC           | -1.32 |        |      |
| C6orf72                 | -1.45 | AKT3      | 1.36 | FIG4           | -1.32 |        |      |
| FUCA1                   | -1.45 | IL32      | 1.35 | CIB2           | -1.32 |        |      |
| NRP2                    | -1.44 | CNRIP1    | 1.34 | NFKBIA         | -1.31 |        |      |
| SGMS2                   | -1.43 | MED24     | 1.34 | GLIS3          | -1.31 |        |      |
| C4orf34                 | -1.43 | CRLF3     | 1.34 | NRAS CSDE<br>1 | -1.31 |        |      |
| FAM171A1                | -1.42 | SHISA3    | 1.33 | CNTNAP1        | -1.31 |        |      |
| TMBIM4 LOC10013332<br>2 | -1.42 | ZYX       | 1.33 | ARL15          | -1.30 |        |      |

|            |       |                |      |        |       |  |  |
|------------|-------|----------------|------|--------|-------|--|--|
| MET        | -1.42 | CENPH          | 1.33 | SCML2  | -1.30 |  |  |
| TAF10      | -1.41 | NCRNA0015<br>2 | 1.32 | SEPX1  | -1.29 |  |  |
| TP53       | -1.41 | DPH5           | 1.32 | DIRC2  | -1.29 |  |  |
| C20orf3    | -1.41 | RSL24D1        | 1.31 | IL6ST  | -1.29 |  |  |
| ITGB3      | -1.41 | MPZ            | 1.31 | CSF1   | -1.28 |  |  |
| ATXN1      | -1.41 | SLC16A3        | 1.31 | SEMA4B | -1.27 |  |  |
| ATF6B TNXB | -1.40 | SLC16A9        | 1.31 | NAB1   | -1.26 |  |  |
| HOXA2      | -1.40 | METTL3         | 1.31 | LHFP   | -1.26 |  |  |
| ATF6B TNXB | -1.40 | TMEM120B       | 1.31 |        |       |  |  |
| ENTPD7     | -1.40 | THOC6          | 1.31 |        |       |  |  |
| SYT14      | -1.39 | POLR3D         | 1.31 |        |       |  |  |
| TMEM63B    | -1.38 | DNMT3B         | 1.31 |        |       |  |  |
| UBE3B      | -1.38 | JUND           | 1.30 |        |       |  |  |
| REEP3      | -1.38 | AKAP12         | 1.30 |        |       |  |  |
| RNF185     | -1.36 | DTD1           | 1.30 |        |       |  |  |
| FUT8       | -1.36 | SNRNP27        | 1.29 |        |       |  |  |
| HOXA3      | -1.35 | STAC           | 1.29 |        |       |  |  |
| EAF1       | -1.35 | ATG4D KRI1     | 1.28 |        |       |  |  |
| ATP6V1C1   | -1.35 | OSBPL1A        | 1.28 |        |       |  |  |
| SLC9A7     | -1.35 | FKBP11         | 1.28 |        |       |  |  |
| RNF141     | -1.34 | MRPS23         | 1.28 |        |       |  |  |
| ANPEP      | -1.34 | SMAP2          | 1.27 |        |       |  |  |
| KIAA1370   | -1.34 | RPUSD3         | 1.26 |        |       |  |  |
| TMEM56     | -1.34 | MRPL47         | 1.26 |        |       |  |  |
| DCTN5      | -1.34 | ZBTB11         | 1.26 |        |       |  |  |
| GPATCH8    | -1.34 |                |      |        |       |  |  |

|                   |       |  |  |  |  |  |  |
|-------------------|-------|--|--|--|--|--|--|
| GGCX              | -1.34 |  |  |  |  |  |  |
| MYLIP             | -1.33 |  |  |  |  |  |  |
| SSR1              | -1.33 |  |  |  |  |  |  |
| LRRC16A           | -1.33 |  |  |  |  |  |  |
| LTBP3             | -1.33 |  |  |  |  |  |  |
| PPIC              | -1.32 |  |  |  |  |  |  |
| SLC35B4           | -1.32 |  |  |  |  |  |  |
| MAP3K7            | -1.32 |  |  |  |  |  |  |
| PIGQ              | -1.31 |  |  |  |  |  |  |
| MST1R             | -1.30 |  |  |  |  |  |  |
| SLC9A6            | -1.30 |  |  |  |  |  |  |
| YIPF3             | -1.30 |  |  |  |  |  |  |
| SEMA3C            | -1.29 |  |  |  |  |  |  |
| EXOC6B            | -1.29 |  |  |  |  |  |  |
| TMCO3             | -1.29 |  |  |  |  |  |  |
| TMEM9B            | -1.29 |  |  |  |  |  |  |
| DNAJC3            | -1.28 |  |  |  |  |  |  |
| NEU1              | -1.27 |  |  |  |  |  |  |
| C10orf118 MIR2110 | -1.26 |  |  |  |  |  |  |
| HS2ST1            | -1.26 |  |  |  |  |  |  |
| MYD88             | -1.26 |  |  |  |  |  |  |

**Table S2: Validation of Focal adhesion and ECM-receptor interaction gene expression in K-ras mutant NSCLC cells.** Gene expression was validated by qRT-PCR in cell lines expressing  $\delta 193$  and  $\delta 203$  and compared to expression in cells expressing  $\delta scr$  (see Materials and Methods). Values represent fold change relative to  $\delta scr$  cells. nc= no change with PKC $\delta$  depletion; nc\*=predicted down by microarray; nc\*\*=predicted up by microarray.

| Gene   | K-ras dependent |        | K-ras independent |       |
|--------|-----------------|--------|-------------------|-------|
|        | H2009           | H441   | H460              | A549  |
| CFL1   | -1.48           | -1.97  | -1.44             | -1.33 |
| COL5A2 | 1.48            | nc*    | nc                | nc    |
| CPA4   | -1.80           | -42.49 | -3.21             | -1.58 |
| DAG    | -1.33           | -2.29  | nc*               | -1.43 |
| DUSP5  | nc**            | 5.06   | 1.28              | nc    |
| FN1    | nc              | -2.30  | nc                | 1.79  |
| ITGA2  | -2.42           | -2.69  | 1.28              | -1.93 |
| ITGA5  | nc              | nc     | 1.74              | 1.50  |
| ITGA6  | nc              | -1.73  | nc                | nc    |
| ITGAV  | -1.81           | -2.53  | -1.33             | nc    |
| ITGB1  | nc              | nc*    | nc                | nc    |
| ITGB3  | -2.78           | -2.78  | nc                | nc    |
| ITGB4  | nc              | -2.85  | 1.20              | 1.91  |
| JUND   | 1.76            | nc*    | 2.03              | nc    |
| LAMA1  | 1.55            | nc     | -1.58             | nc    |
| LAMA4  | -1.87           | -3.32  | -3.85             | 7.78  |
| LAMB2  | -1.48           | -2.88  | -1.86             | -1.39 |
| LAMC1  | nc              | nc     | nc                | nc    |
| LAMC2  | -2.04           | -2.28  | nc                | -2.07 |
| LXN    | nc              | -56.94 | nc*               | nc    |
| MMP16  | 1.73            | nc     | -1.56             | nc    |
| MMP19  | -               | -1.93  | -1.80             | nc    |
| MMP2   | 1.12            | -2.19  | -1.58             | 2.92  |
| RELN   | 1.32            | nc**   | nc                | nc    |
| TNC    | 1.69            | 1.23   | 11.79             | 1.46  |
| TNXB   | -2.72           | -2.03  | 2.53              | nc    |
| VTN    | -1.62           | -6.37  | nc                | nc    |

**Table S3: Primers used for qRT-PCR.**

| Gene   | Forward (5' to 3')        | Reverse (5' to 3')        |
|--------|---------------------------|---------------------------|
| CD274  | TGCCGACTACAAGCGAATTACTG   | CTGCTTGTCCAGATGACTTCGG    |
| CFL1   | GCAACCTATGAGACCAAGGAGAG   | TCTTGATGGCGTCCTTGGAGCT    |
| COL5A2 | GAAGCCTCCCAGAACATCACTTAC  | TTGCCCTTTGAGAACCACAGC     |
| CPA4   | CAATGAAGGGCAAGAACGGAGC    | GGTCAGGAAAGTCTGCGGCAAT    |
| DAG    | CCACAGTGGTTGGCATTCTGA     | CCAAGATGGCAAAGCCTCCTTC    |
| DUSP5  | CAGCATCCTGATTTGAACCCTG    | TCCAGAAAAGCCAACATCTTGC    |
| FN1    | TGTCTATGCTCAGAATCCAAGCG   | CCACATCAGTGAATGCCAGTCC    |
| GAPDH  | GCCAAATATGATGACATCAAGAAGG | GGTGTGCGTGTTGAAGTCAGAG    |
| ITGA2  | TGTTACCTGCTGGTTGAAAGACG   | TGATGCGAAAGTCCCCTTCC      |
| ITGA5  | CTCCTTCTTCGGATTCTCAGTGG   | TGGTATTAGCCTTGGGTGCTCC    |
| ITGA6  | CGAGGTTATGGAACAGCACATTTT  | TTTCGGCAGCAGCAGTCACATC    |
| ITGAV  | AGGAGAAGGTGCCTACGAAGCT    | GCACAGGAAAGTCTTGCTAAGGC   |
| ITGB1  | GCCCTCCAGATGACATAGAAAATCC | TGCTGTTCTTTGCTACGGTTG     |
| ITGB3  | AAGCAGAGTGTGTACGGAACC     | CCTCCAGCCAATCTTTTCATCAC   |
| ITGB4  | CTCGCCAAGCACAACATCATC     | CAGTGAGGAGACAGGGAAATAGGTG |
| JUND   | ATCGACATGGACACGCAGGAGC    | CTCCGTGTTCTGACTCTTGAGG    |
| LAMA1  | TGGCAGGGAAAAGGTGTGACAG    | TCGCAGGTATTCTGAGTGTGTGGG  |
| LAMA4  | TGGCTCACCAATCAGTGCTCAG    | TCCACATCTCTATCCACCCTGG    |
| LAMB2  | ACGGCACTGGGATGATGTAGTC    | AGCACACGATAGATGACCTCGC    |
| LAMC1  | TGTTCCCAAGACAAAGGAGGTG    | CCAAAGTAGCCATCATCACAGAGC  |
| LAMC2  | CTGGGAAACTGGAAGAAGAAGC    | TTTAGCAAGATTGGCACGGG      |
| LTX    | GCGACTTTTCCGCCTCGGCA      | TGGGTAGTTGGTCGGCGGGA      |
| MAP3K7 | CAGAGCAACTCTGCCACCAGTA    | CATTTGTGGCAGGAAGTCTGCTCC  |
| MET    | TGCACAGTTGGTCTGCCATGA     | CAGCCATAGGACCGTATTTCCGG   |
| MMP16  | GCAGCACAAGCACATCACTTACAG  | CATCAAAGGCACGGCGAATAG     |
| MMP19  | CAGTGCCACAGAACCCAGTC      | TGAAAGCATAGGTCTTCCCACG    |
| MMP2   | GTGTCTTCCCCTTCACTTTCCTG   | ACCACATCTTCCGTCAGTCCG     |
| MYC    | GCTCGCCCTCCTACGTTGCG      | TGGTCGGCCGTGGAGAAGCT      |
| RELN   | GTCTACCTTCCACTCTCCACCA    | GTCCAGCATCACAAATCCCTCG    |
| TNC    | ATGTCCTCCTGACAGCCGAGAA    | AGTCACGGTGAGGTTTTCCAGC    |
| TNXB   | CTGGAATCCGACCACAGATACC    | TGGGAGGTTCTGAAGGCTTCTC    |
| VTN    | TGGACGAAAAGGCAGTGAGG      | TGACAGTTGATGCGGGTGAAGG    |
